# Supplementary material for: Antigenic Cartography Indicates That Omicron BA.1 and BA.4/BA.5 Variants Remain Antigenically Distant to Ancestral SARS-CoV-2 After Sputnik V Vaccination Followed by Homologous (Sputnik V) or Heterologous (Comirnaty) Revaccination
Source: Preprints.org preprint supplement (doi:10.20944/preprints202305.1591.v1), 2023-05-23
Supplement: Supplementary file 1 [file supplementary]

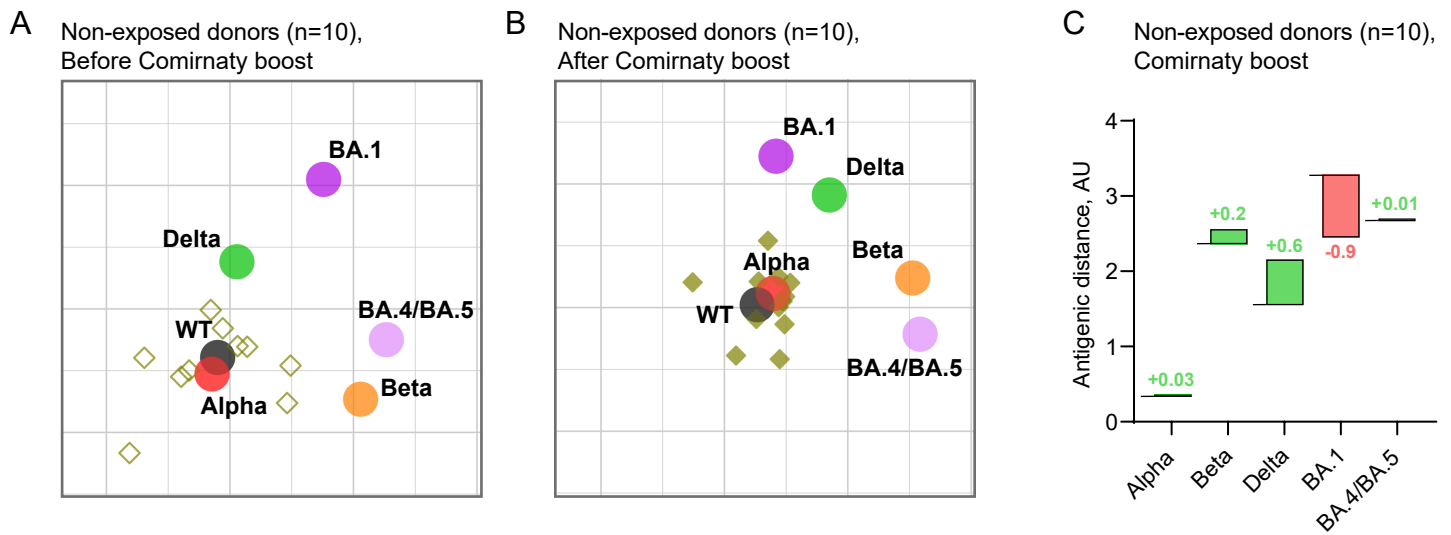

Figure S1. Antigenic maps of (A) pre- and (B) post-boost serum samples against wild-type (WT), Alpha, Beta, Delta, and Omicron BA.1 and BA.4/BA.5 variants from non-exposed donors with Comirnaty boost. Unlike Figure 2G,H,I, two outlier samples were not included in the consideration. (C) Hat graphs represent changes in antigenic distances between the WT and Spike variants during revaccination. The brim of the hat corresponds to the antigenic distance for pre-boost samples. The hat height indicates the change in antigenic distance between pre- and post-boost samples. Green/red hats indicate increase/decrease in antigenic distance. The numbers indicate the corresponding changes in the antigenic units.
