# Supplementary material for: Antigenic Cartography Indicates That Omicron BA.1 and BA.4/BA.5 Variants Remain Antigenically Distant to Ancestral SARS-CoV-2 After Sputnik V Vaccination Followed by Homologous (Sputnik V) or Heterologous (Comirnaty) Revaccination
Source: Preprints.org preprint supplement (doi:10.20944/preprints202305.1591.v1), 2023-05-23
Supplement: Supplementary file 2 [file supplementary]

Archive with 1 entries (1 files):
- Fig. S1.pdf
